# Supplementary material for: The Effect of Carbon Doping on the Crystal Structure and Electrical Properties of Sb2Te3
Source: MDPI journal article supplement (doi:10.3390/nano13040671), 2023-02-09
Supplement: s1 [file s1]

# Supplementary Materials

## The Effect of Carbon Doping on the Crystal Structure and Electrical Properties of Sb<sub>2</sub>Te<sub>3</sub>

Jie Zhang <sup>1</sup>, Ningning Rong <sup>1</sup>, Peng Xu <sup>1</sup>, Yuchen Xiao <sup>1</sup>, Aijiang Lu <sup>1</sup>, Wenxiong Song <sup>2</sup>, Sannian Song <sup>2</sup>, Zhitang Song <sup>2</sup>, Yongcheng Liang <sup>1</sup> and Liangcai Wu <sup>1,3,\*</sup>

<sup>1</sup> College of Science, Donghua University, Shanghai 201620, China

<sup>2</sup> State Key Laboratory of Functional Materials for Informatics, Shanghai Institute of Microsystem and Information Technology, Chinese Academy of Sciences, Shanghai 200050, China

<sup>3</sup> Shanghai Institute of Intelligent Electronics & Systems, Shanghai, China

\* Correspondence:

Corresponding Author

lcwu@dhu.edu.cn (L.W.)

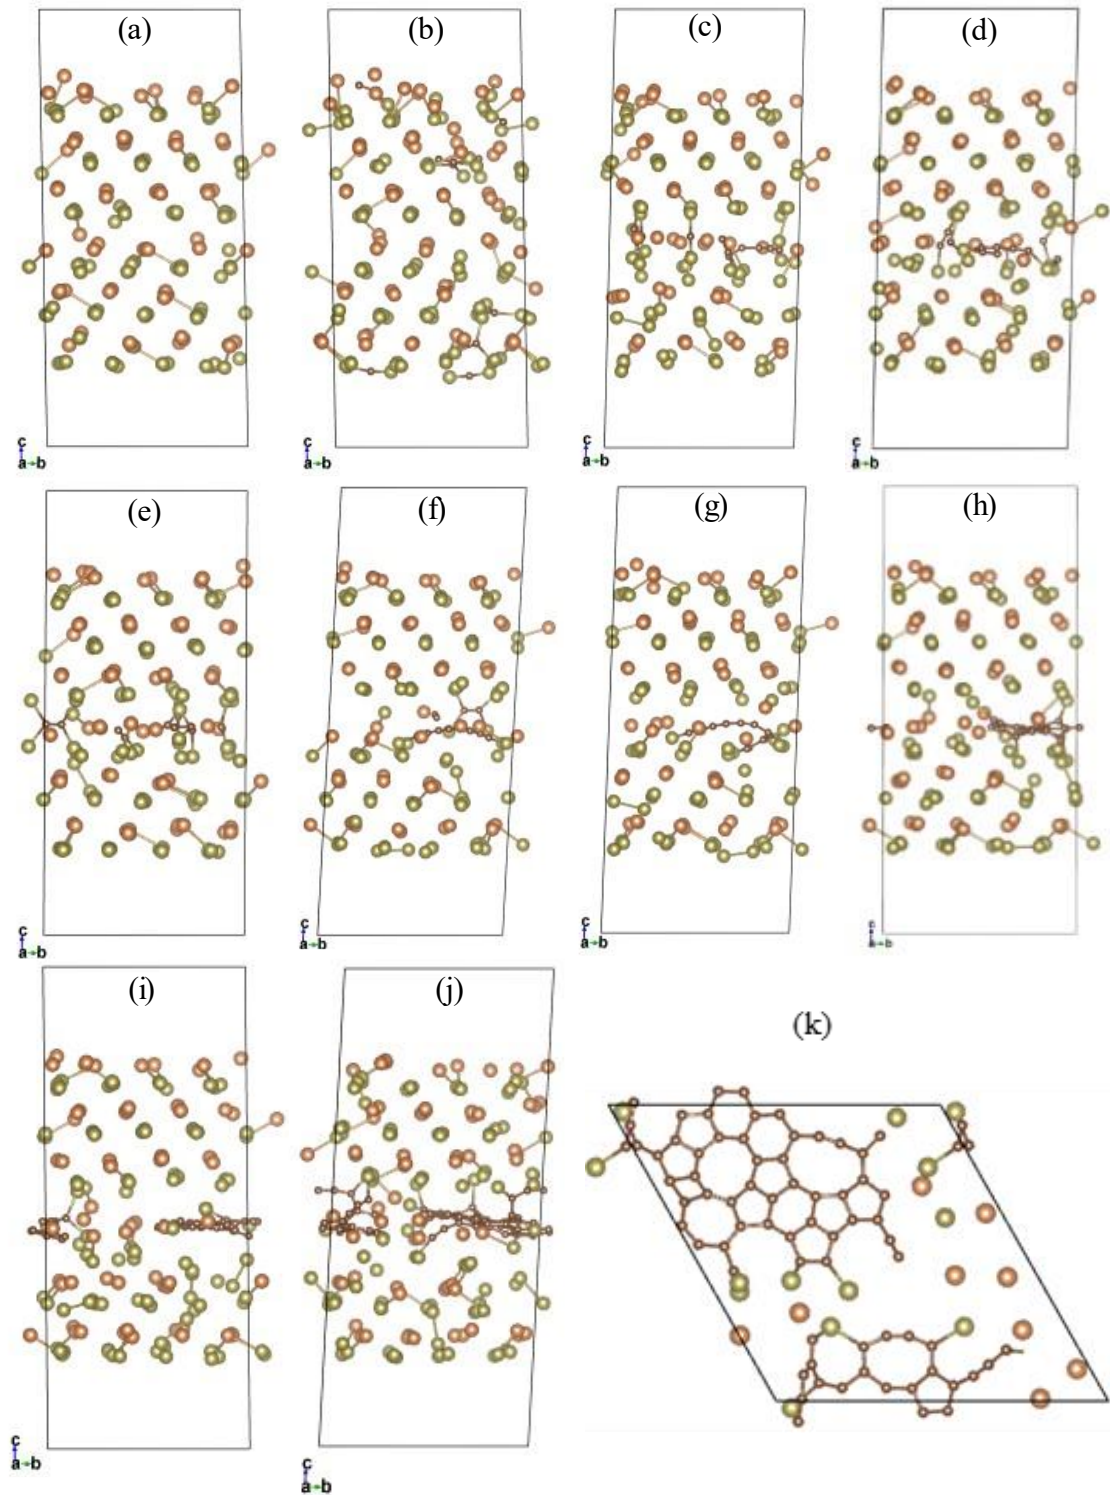

Figure S1. After structural relaxation of different C doping contents and C existing forms. (a)  $\text{Sb}_2\text{Te}_3$ , (b) 12 C atoms are randomly distributed in  $\text{Sb}_2\text{Te}_3$ , (c) 12 C atoms are randomly distributed in the crystal plane, (d) (e) the short C chains (12 C atoms in

total) is distributed in the crystal plane, (f) (g) the long C chain (12 C atoms in total) is distributed in the crystal plane, (h) the long C chain (24 C atoms in total) is distributed in the crystal plane, (i) the long C chain (36 C atoms in total) is distributed in the crystal plane, (j) the long C chain (64 C atoms in total) is distributed in the crystal plane, (k) Top view of C atoms distribution in figure (j). Note that the initial positions of C atoms in Figures (b) and (c) are scattered, and after the structure relaxes, the C atoms gradually converge to form a short C chain.

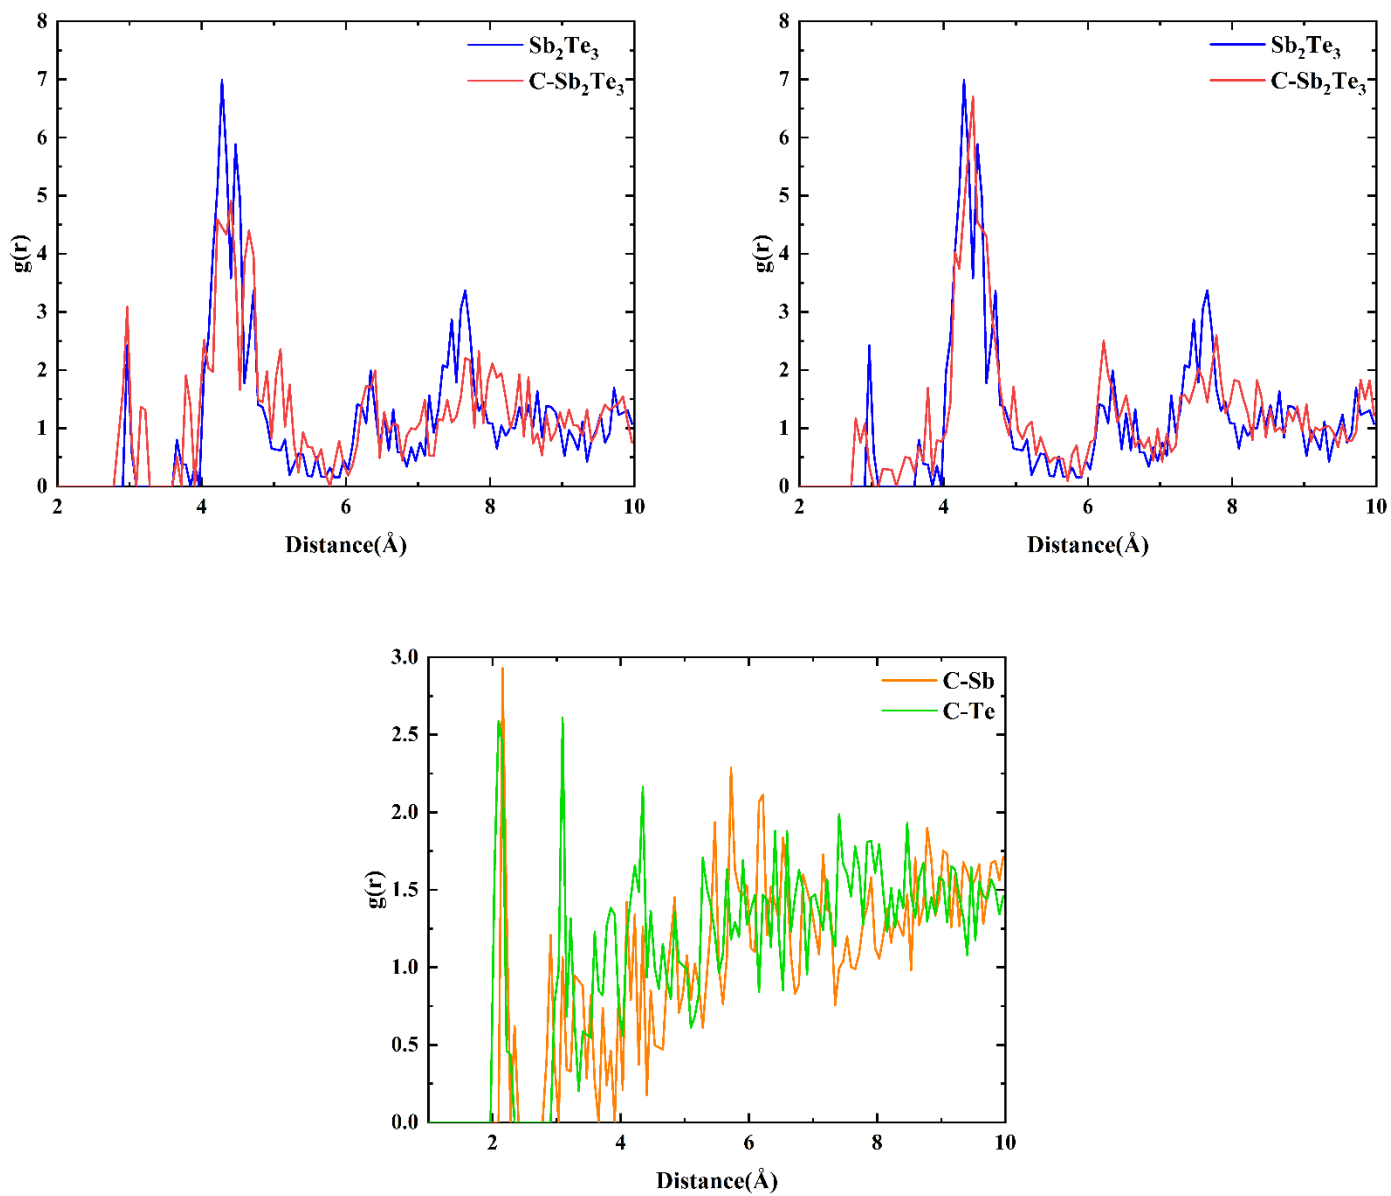

Figure S2. The pair correlation function after structure relaxation. (a)  $\text{Sb-Sb}$  bond, (b)  $\text{Te-Te}$  bond, (c)  $\text{C-Sb}$  bond and  $\text{C-Te}$  bond.

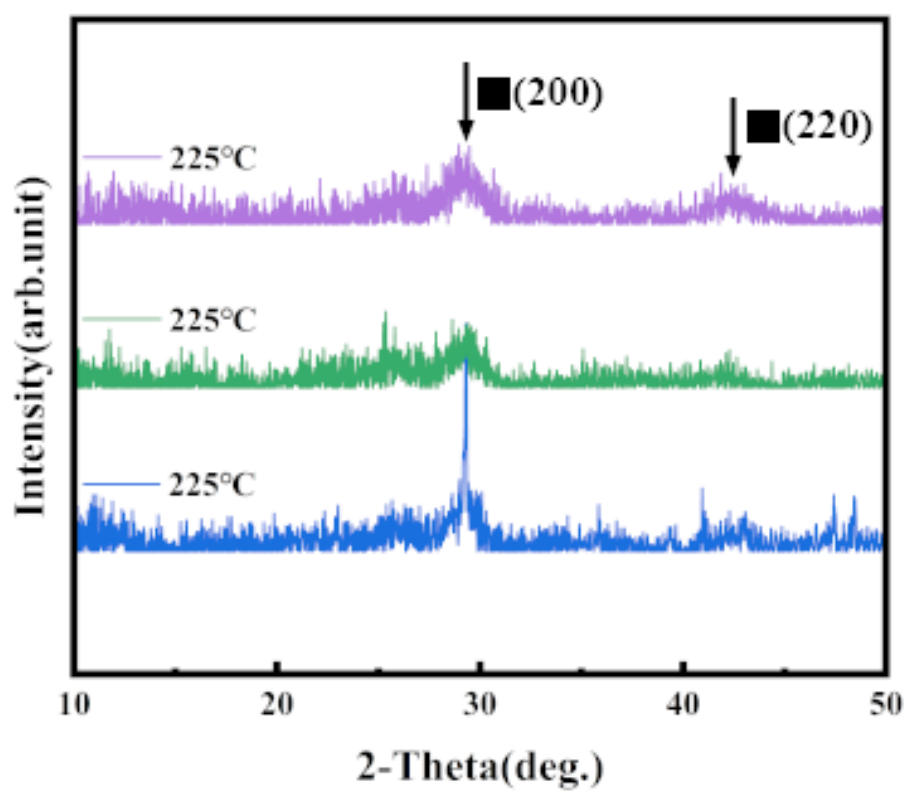

Figure S3. XRD diagram of  $C_{40}WSb_2Te_3$  at 225°C.

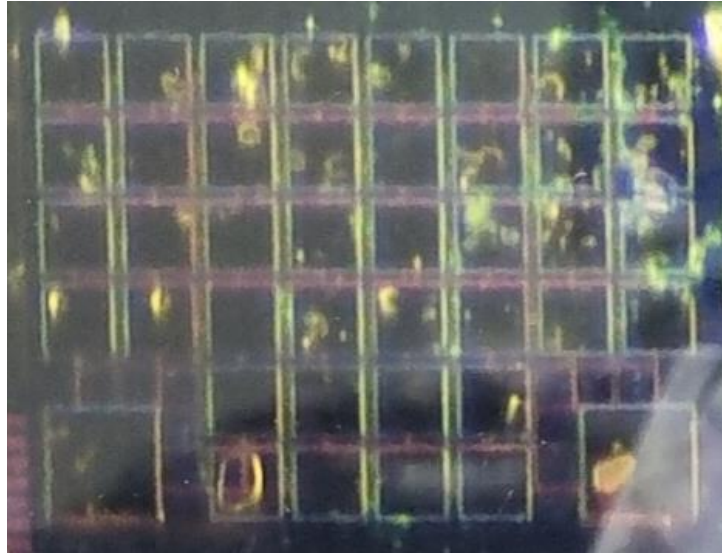

Figure S4. The optical image of the fabricated PCRAM cells.

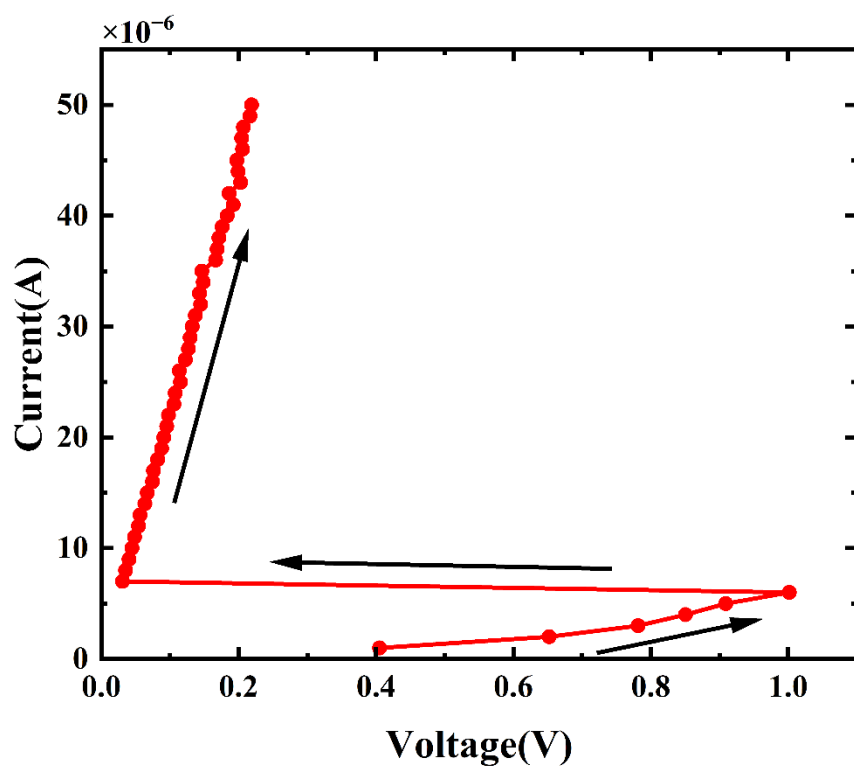

Figure S5. I-V curve of PCRAM unit set from high resistance state to low resistance state by DC current.

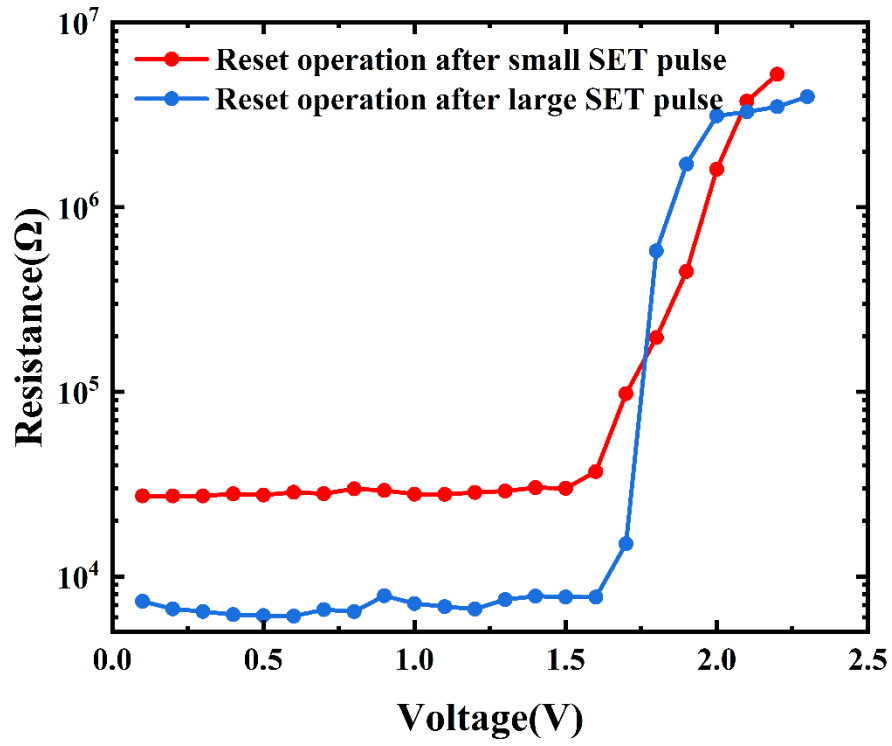

Figure S6. SET the PCRAM in a low resistance state with a large / small set pulse, and then RESET it with a 500ns pulse to obtain a continuously adjustable resistance value.
